# Supplementary material for: Suppression of inflammatory and infection responses in lung macrophages by eucalyptus oil and its constituent 1,8-cineole: Role of pattern recognition receptors TREM-1 and NLRP3, the MAP kinase regulator MKP-1, and NFκB
Source: PubMed Central journal article supplement (PMC5687727; doi:10.1371/journal.pone.0188232), 2017-11-15
Supplement: pone.0188232.s001.pdf [file pone.0188232.s001.pdf]

# Supplementary information: On figures 5 and 6 western blots

## Figure 5 Panel A

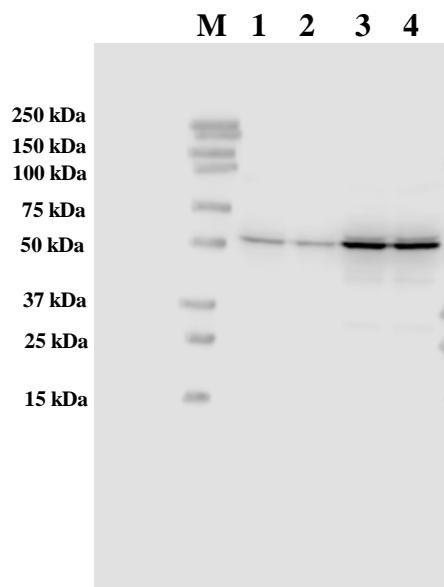

Blot\_Phos p38 (EO)

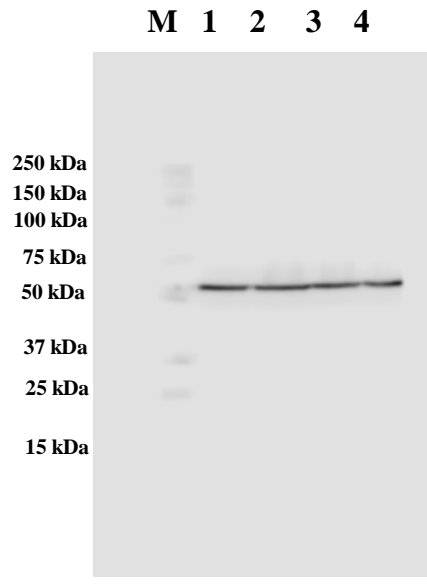

Blot\_Total p38 (EO)

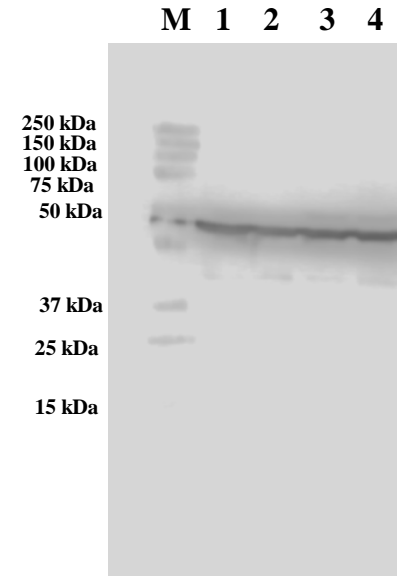

Blot\_β-actin (EO)

Figure 5 Panel B

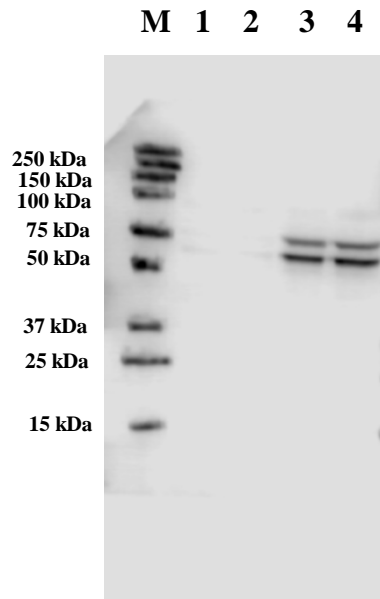

Blot\_ Phos JNK1/2 (EO)

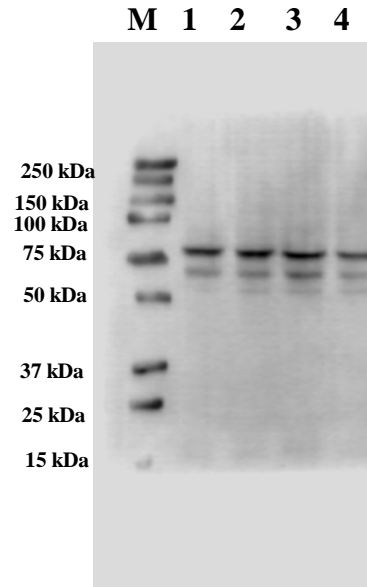

Blot\_ Total JNK1/2 (EO)

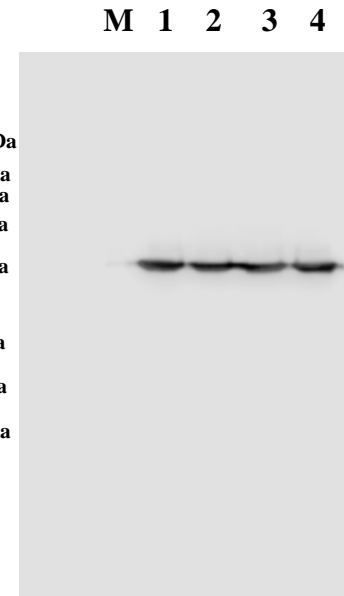

Blot\_  $\beta$ -actin (EO)

Figure 5 Panel C

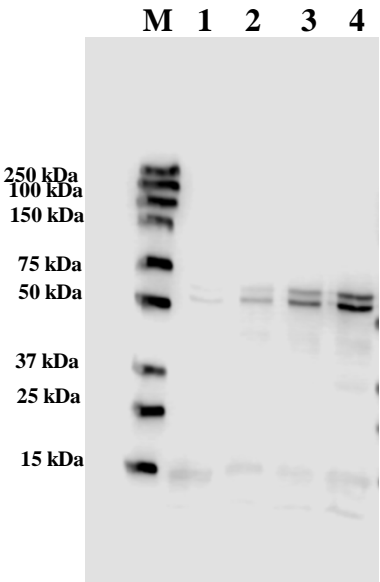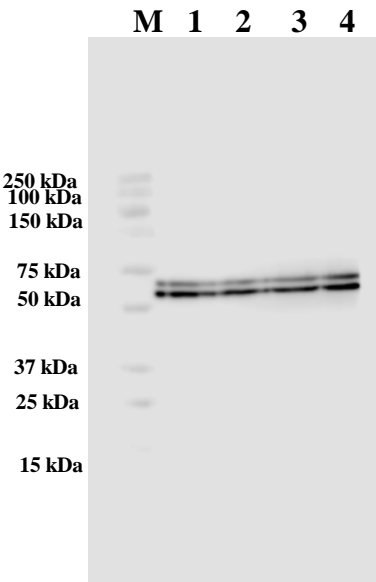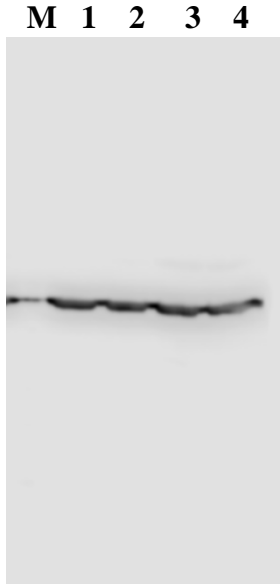

Blot\_ Phos ERK1/2 (EO) Blot\_ Total ERK1/2 (EO)

Blot\_  $\beta$ -actin (EO)

Figure 5 Panel D

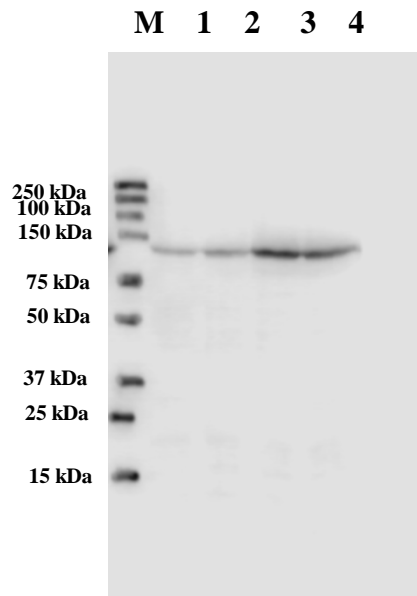

Blot\_ Phos NFκB (EO)

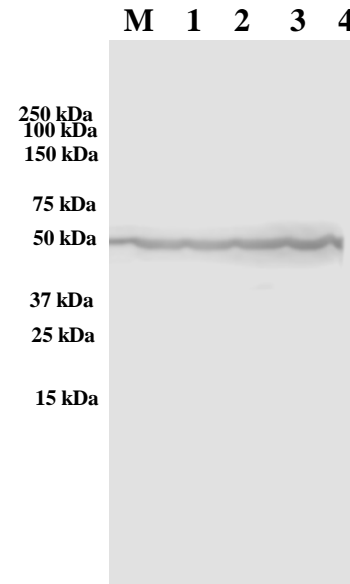

Blot\_ β-actin (EO)

**Figure 5 Panel E**

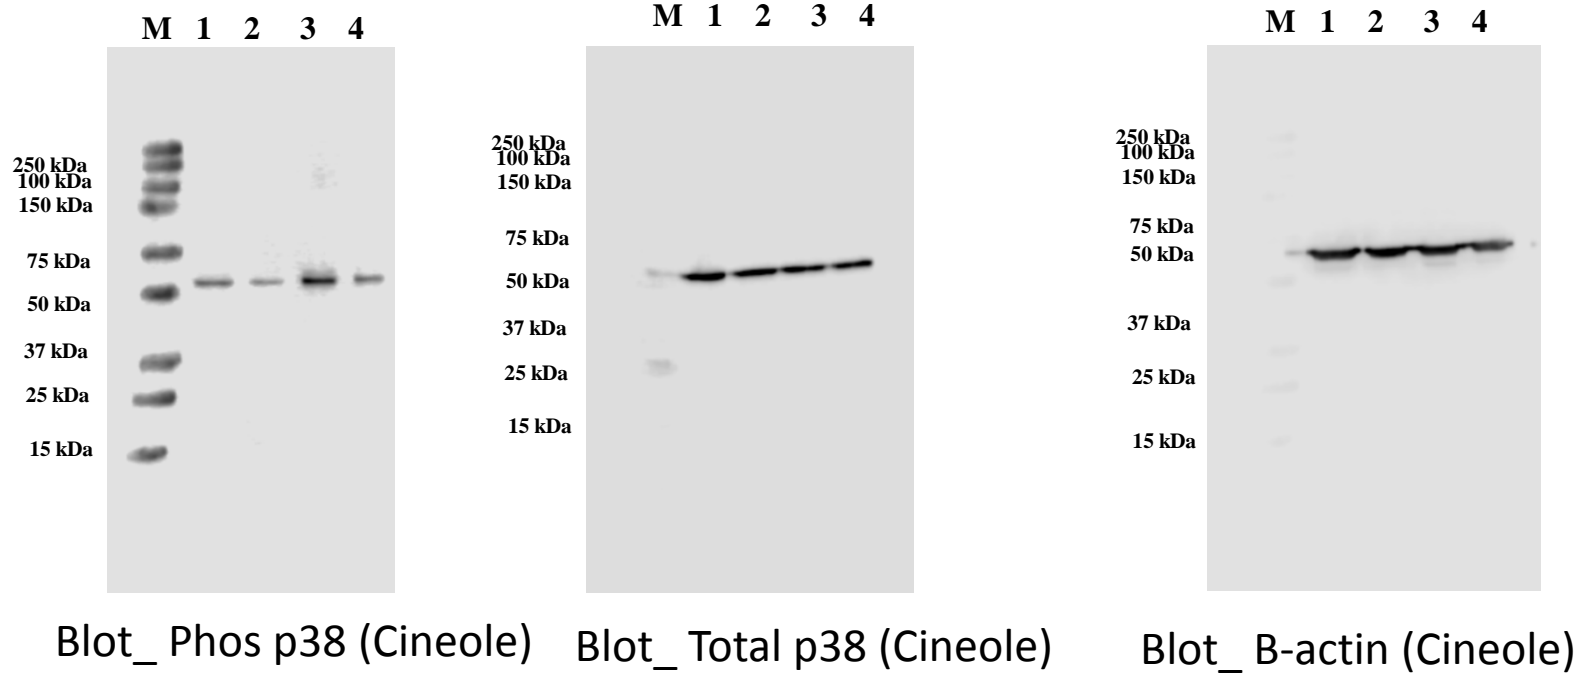

Figure 5 Panel F

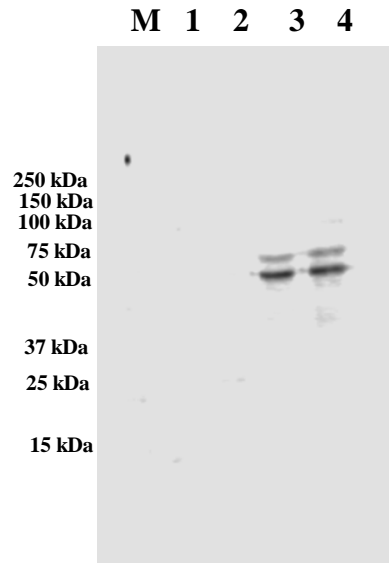

Blot\_Phos JNK1/2 (Cineole)

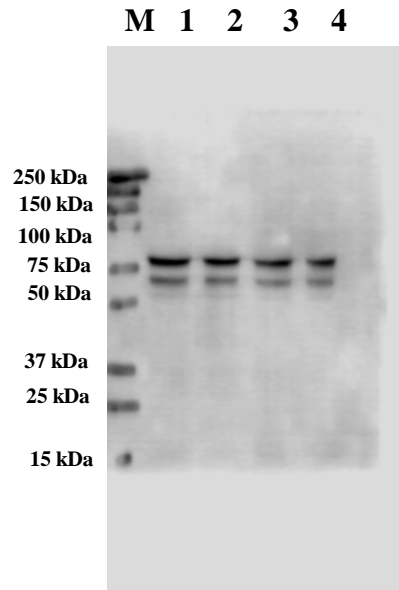

Blot\_Total JNK1/2 (Cineole)

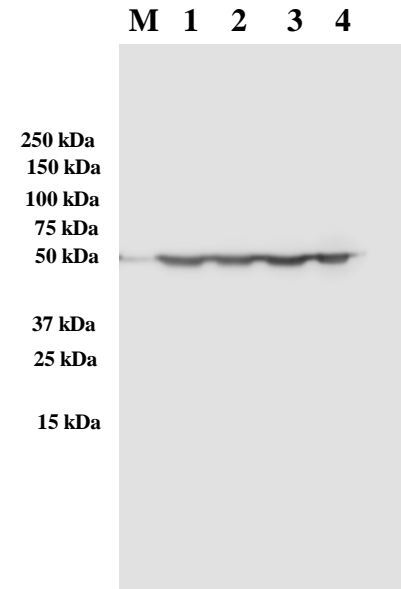

Blot\_B-actin (Cineole)

Figure 5 Panel G

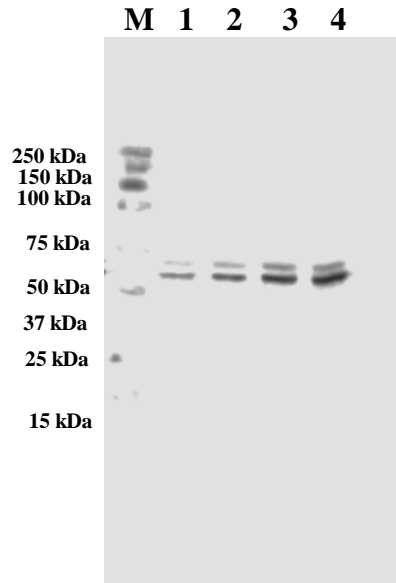

Blot\_ Phos ERK1/2 (Cineole)

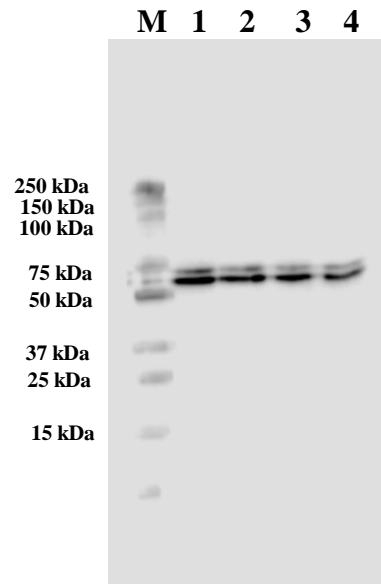

Blot\_ Total ERK1/2 (Cineole)

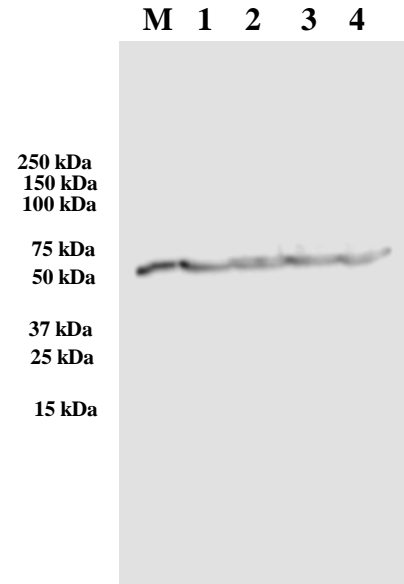

Blot\_  $\beta$ -actin (Cineole)

Figure 5 Panel H

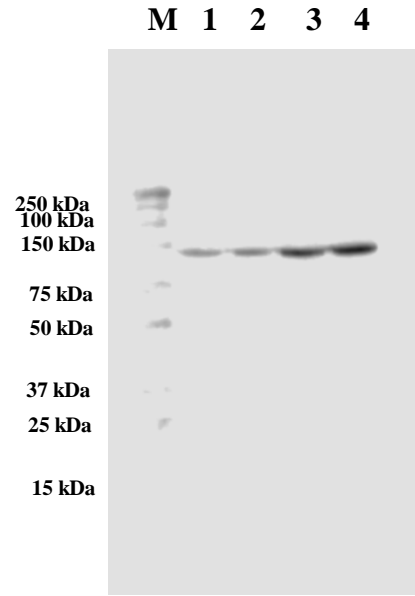

Blot\_Phos NFκB (Cineole)

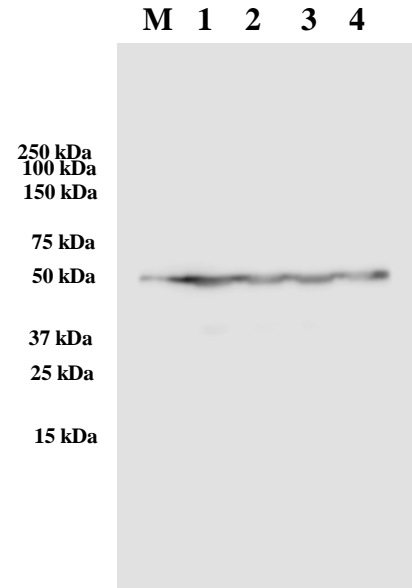

Blot\_β-actin (Cineole)



**Figure 6**

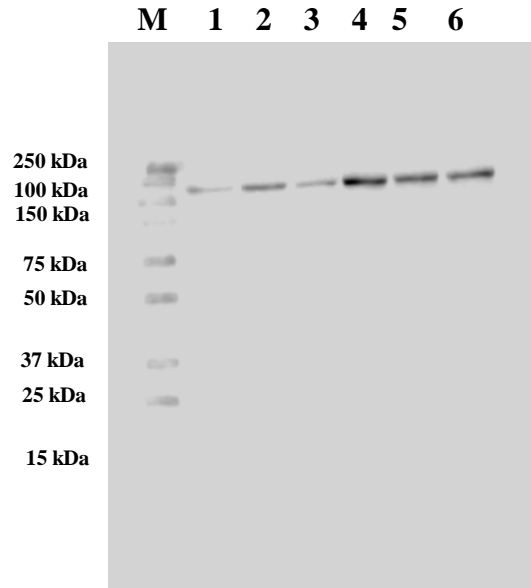

Blot\_ NLRP3

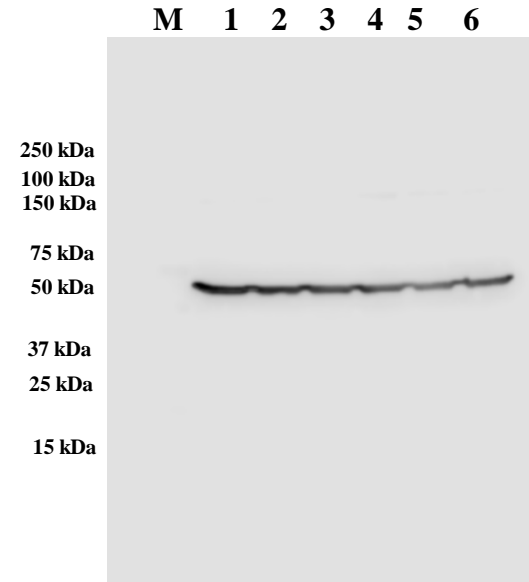

Blot\_  $\beta$ - actin NLRP3
